# Supplementary material for: Unveiling Non-Covalent Interactions in Novel Cooperative Photoredox Systems for Efficient Alkene Oxidation in Water
Source: MDPI journal article supplement (doi:10.3390/molecules29102378), 2024-05-18
Supplement: s1 [file s1]

## SUPPORTING INFORMATION

### **Unveiling Non-Covalent Interactions in Novel Cooperative Photoredox Systems for Efficient Alkene Oxidation in Water**

*Isabel Guerrero,<sup>a</sup> Clara Viñas,<sup>a</sup> Francesc Teixidor<sup>a\*</sup> and Isabel Romero,<sup>b\*</sup>*

<sup>a</sup>Institut de Ciència de Materials de Barcelona, ICMA-B-CSIC, Campus UAB, E-08193 Bellaterra, Spain.  
and Serveis Tècnics de Recerca, Universitat de Girona, C/ M. Aurèlia Campmany, 69, E-17003 Girona, Spain.

<sup>b</sup>Departament de Química and Serveis Tècnics de Recerca, Universitat de Girona, C/ M. Aurèlia Campmany, 69, E-17003 Girona, Spain.

\*Correspondence to: marisa.romero@udg.edu; teixidor@icmab.es;

## TABLE OF CONTENTS

**Figure S1.** IR spectrum of **Ag[Cl<sub>6</sub>-1]**.

**Figure S2.** IR spectrum of **5**.

**Figure S3.** a) <sup>1</sup>H{<sup>11</sup>B}-NMR and b) <sup>11</sup>B{<sup>1</sup>H}-NMR spectra of **Ag[Cl<sub>6</sub>-1]** compound in acetone-d<sub>6</sub>.

**Figure S4.** a) <sup>1</sup>H-NMR; b) <sup>1</sup>H{<sup>11</sup>B}-NMR; c) <sup>11</sup>B{<sup>1</sup>H}-NMR d) <sup>11</sup>B-NMR and e) COSY NMR spectra of **5**. compound in acetone-d<sub>6</sub>.

**Figure S5.** UV-visible of **Ag[Cl<sub>6</sub>-1]** compound in CH<sub>2</sub>Cl<sub>2</sub>.

**Figure S6.** CV of a) **Ag[Cl<sub>6</sub>-1]** compound in CH<sub>3</sub>CN + 0.1 M TBAH vs Ag/AgCl; b) **5** in CH<sub>3</sub>CN + 0.1 M TBAH vs Ag/AgCl; and c) **5** in a phosphate buffer (pH = 7.12) vs Ag/AgCl; scan rate V= 100 mV/s.

**Figure S7.** Plot of conversion as a function of time for the photoredox catalysis of styrene. Conditions: **4** (0.01 mM), styrene (20 mM), Na<sub>2</sub>S<sub>2</sub>O<sub>8</sub> (26 mM), 5 ml aqueous solution at pH=7, light irradiation (2.2 W, λ~300 nm).

**Figure S8.** ESI-MS spectra of **5**.

**Table S1.** Photooxidation tests performed with complex **4**. Conditions: **4** (0.01 mM), substrate (20 mM), Na<sub>2</sub>S<sub>2</sub>O<sub>8</sub> (26 mM), 5 mL aqueous solution at pH=7.

**Table S2.** Photooxidation of epoxides performed with complex **4**. Conditions: **4** (0.01 mM), epoxide (20 mM), Na<sub>2</sub>S<sub>2</sub>O<sub>8</sub> (26 mM), 5 mL aqueous solution at pH=7.

**Table S3.** Photooxidation tests performed with **5** complex. Conditions: **5** (0.001 mM), substrate (20 mM), Na<sub>2</sub>S<sub>2</sub>O<sub>8</sub> (26 mM), 5 mL aqueous solution at pH=7.

**Figure S1.** IR spectrum of Ag[Cl<sub>6</sub>-1].

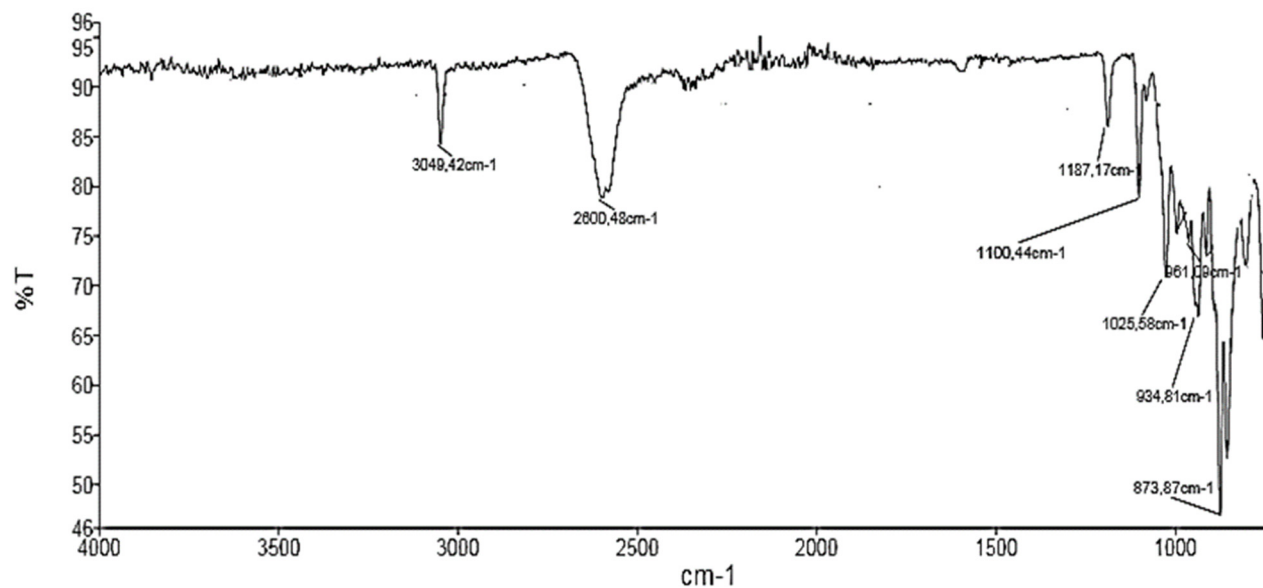

**Figure S2.** IR spectrum of **5**.

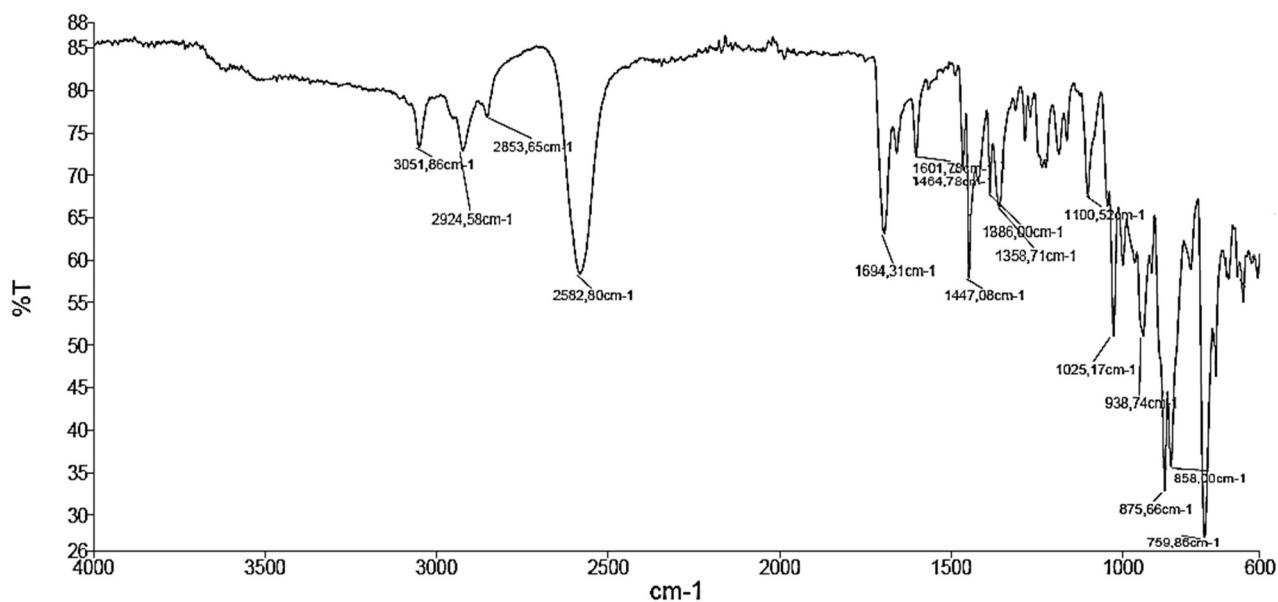

**Figure S3.** a)  $^1\text{H}\{^{11}\text{B}\}$ -NMR and b)  $^{11}\text{B}\{^1\text{H}\}$ -NMR spectra of  $\text{Ag}[\text{Cl}_6\text{-1}]$  compound in acetone- $\text{d}_6$ .

a)

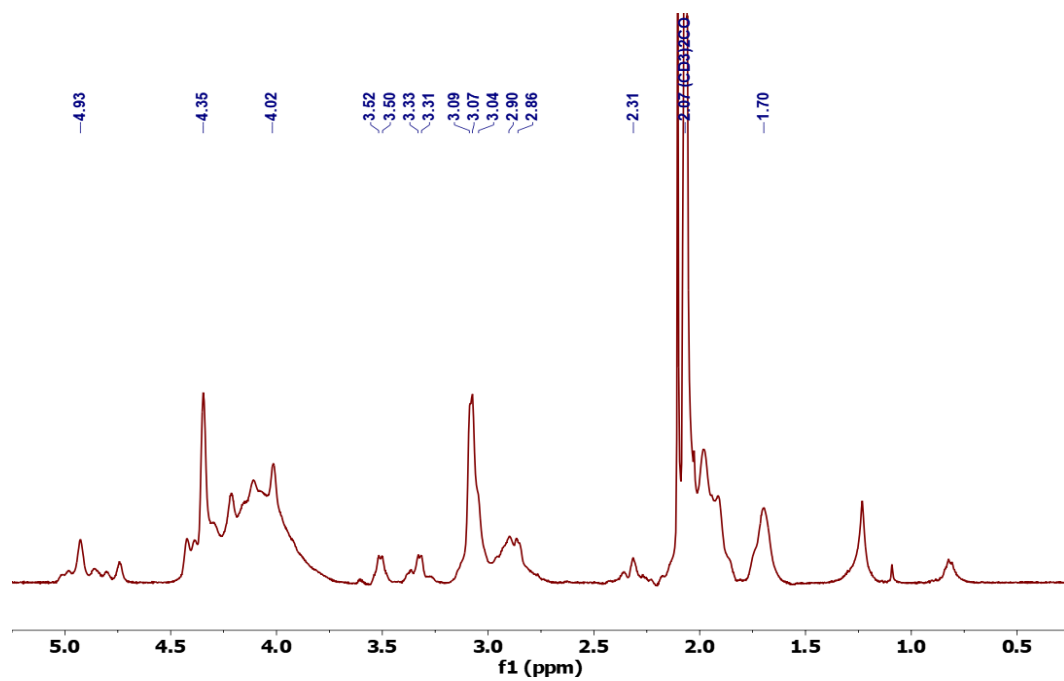

b)

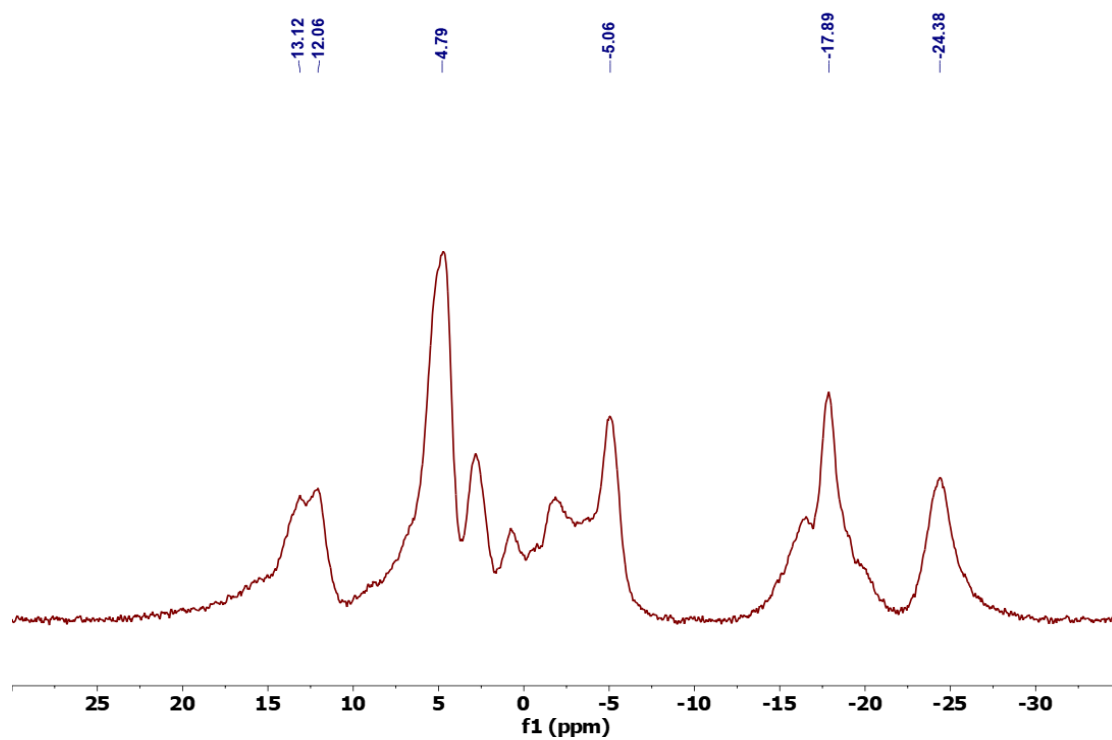

**Figure S4.** a)  $^1\text{H}$ -NMR; b)  $^1\text{H}\{^{11}\text{B}\}$ -NMR; c)  $^{11}\text{B}\{^1\text{H}\}$ -NMR d)  $^{11}\text{B}$ -NMR and e) COSY NMR spectra of **5**. compound in acetone- $\text{d}_6$ .

a)

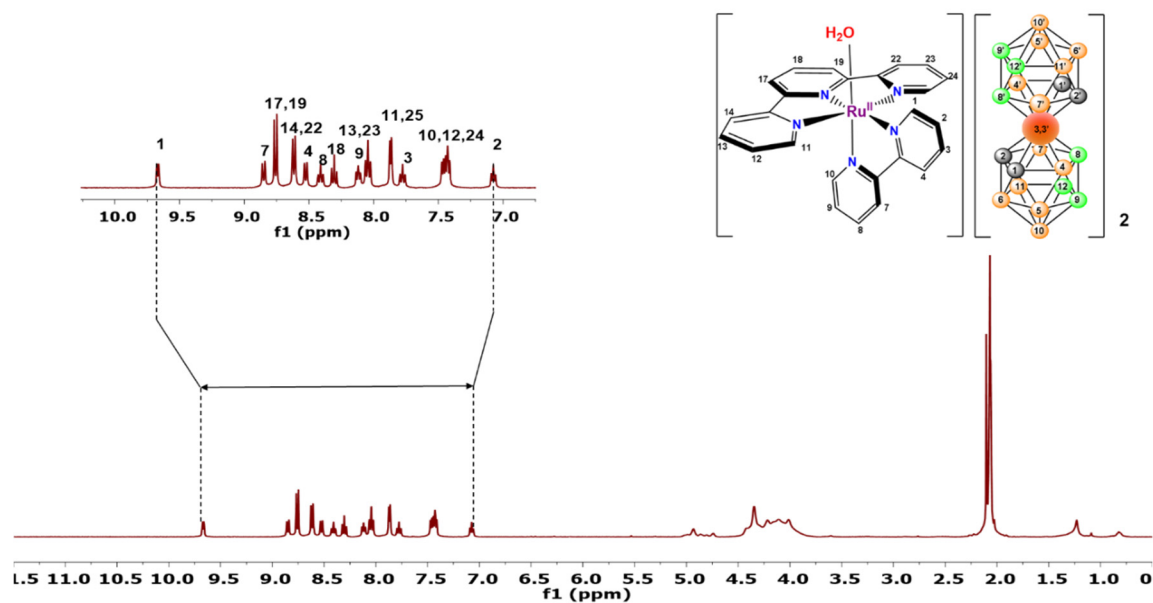

b)

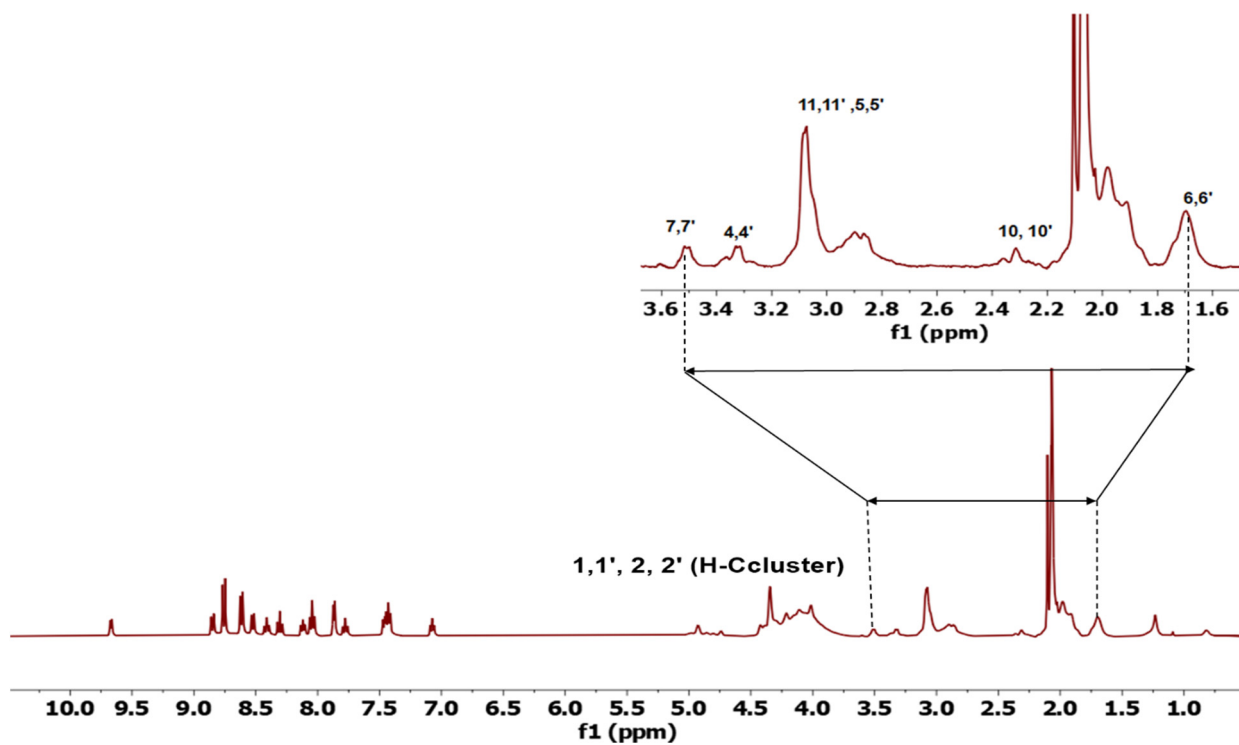

c)

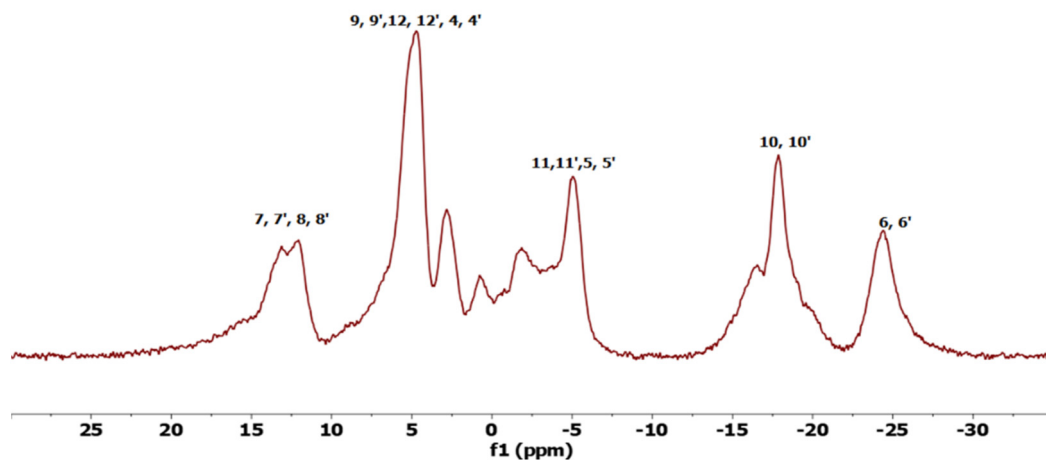

d)

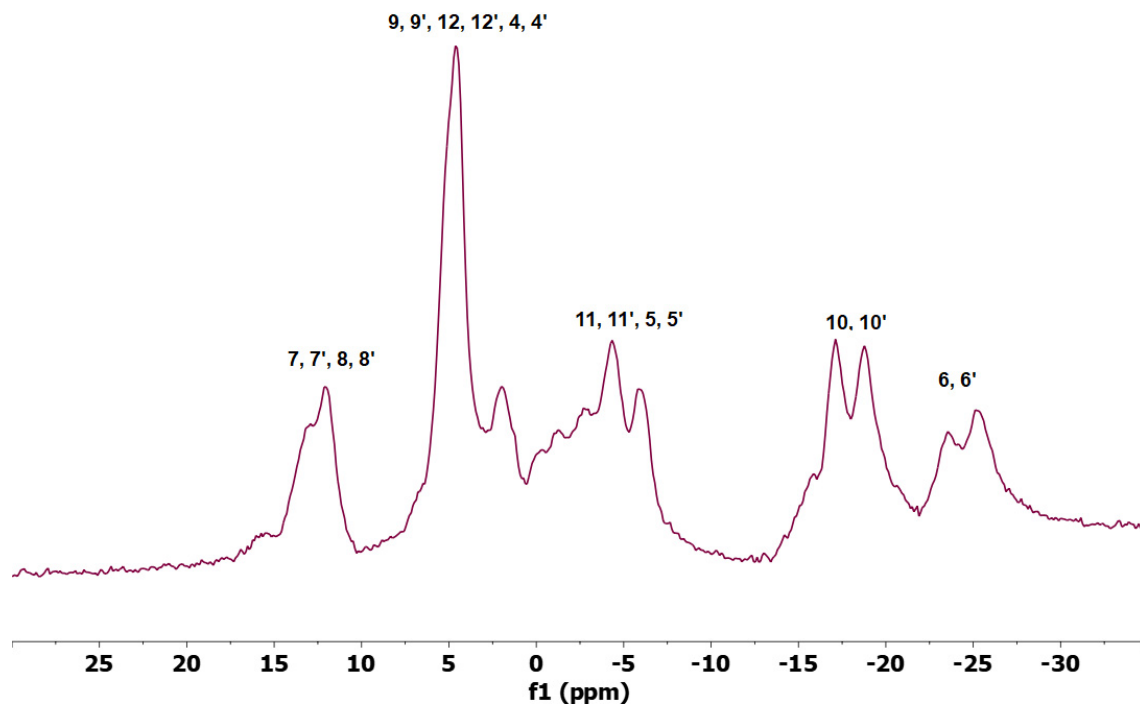

e)

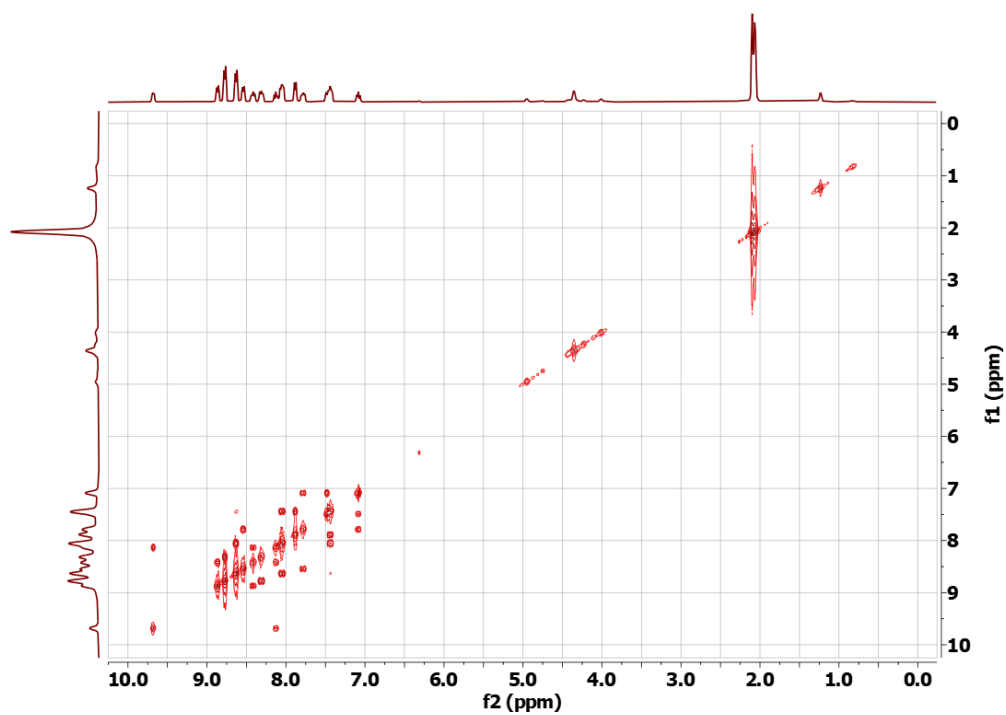

Figure S5. UV-visible of  $\text{Ag}[\text{Cl}_6\text{-1}]$  compound in  $\text{CH}_2\text{Cl}_2$ .

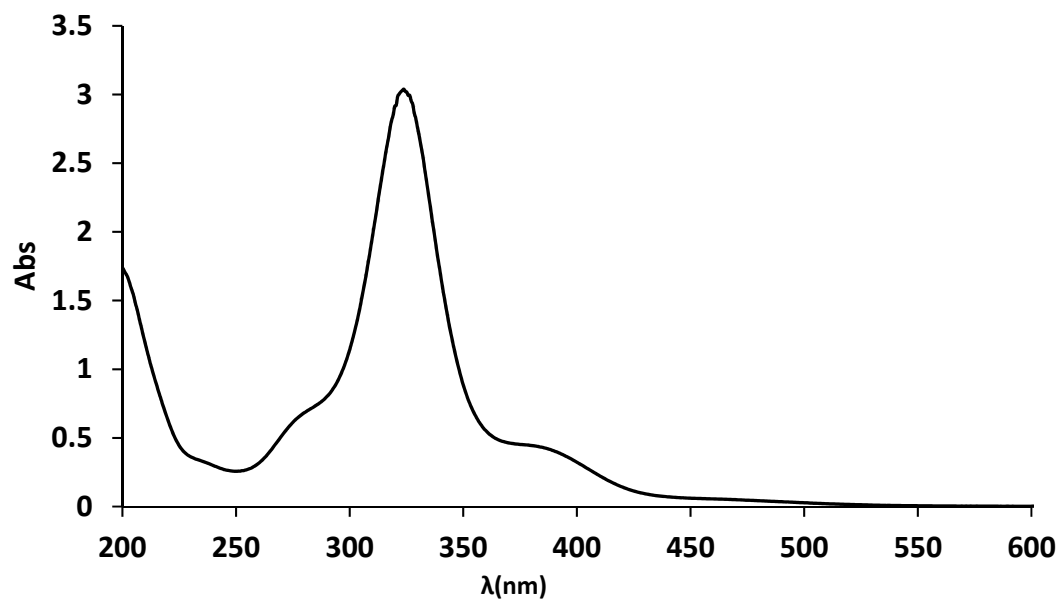

**Figure S6.** CV of a) **Ag[Cl<sub>6</sub>-1]** compound in CH<sub>3</sub>CN + 0.1 M TBAH vs Ag/AgCl; b) **5** in CH<sub>3</sub>CN + 0.1 M TBAH vs Ag/AgCl; and c) **5** in a phosphate buffer (pH = 7.12) vs Ag/AgCl; scan rate V= 100 mV/s.

a)

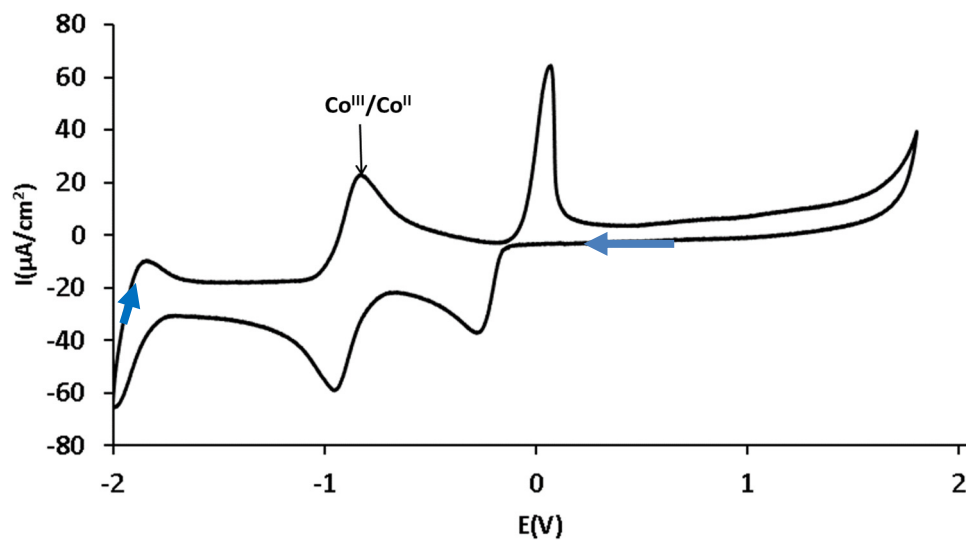

b)

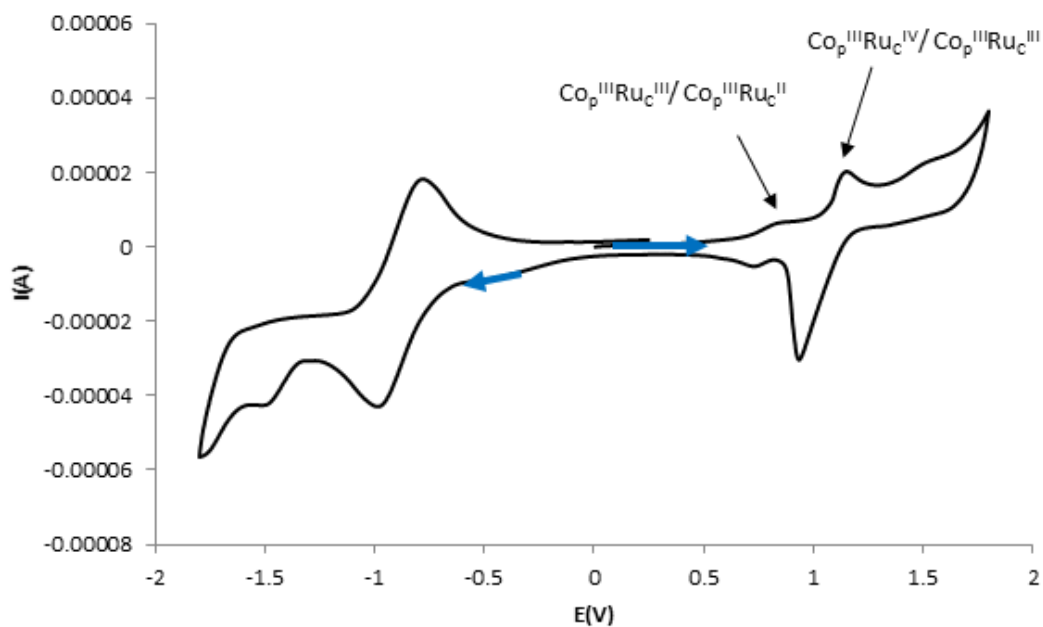



c)

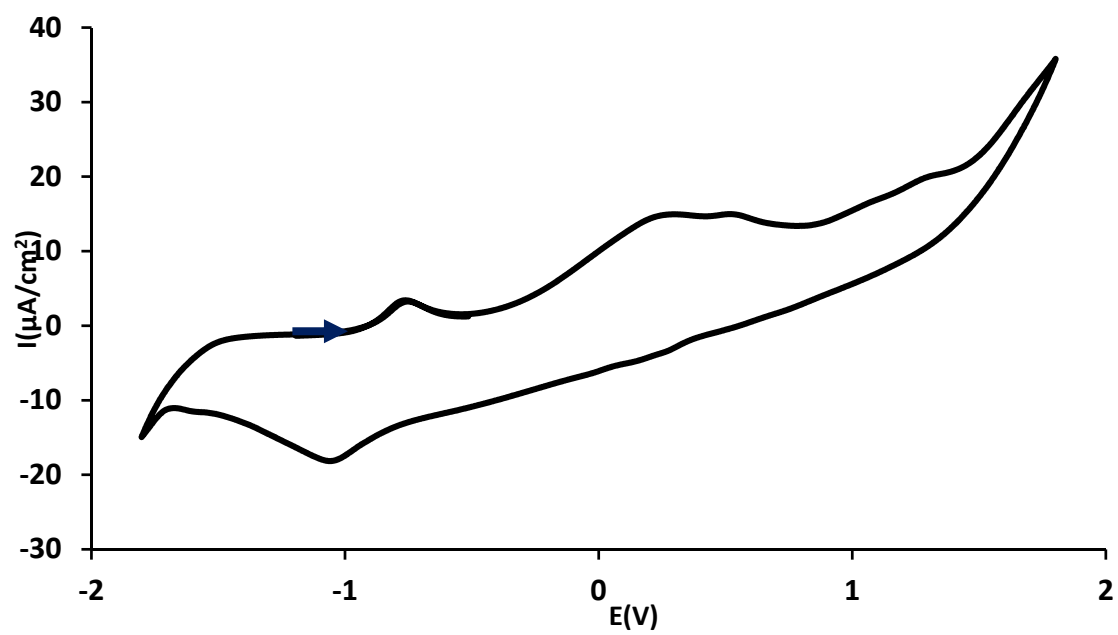

**Figure S7.** Plot of conversion as a function of time for the photoredox catalysis of styrene. Conditions: **4** (0.01 mM), styrene (20 mM), Na<sub>2</sub>S<sub>2</sub>O<sub>8</sub> (26 mM), 5 ml aqueous solution at pH=7, light irradiation (2.2 W,  $\lambda$  ~300 nm).

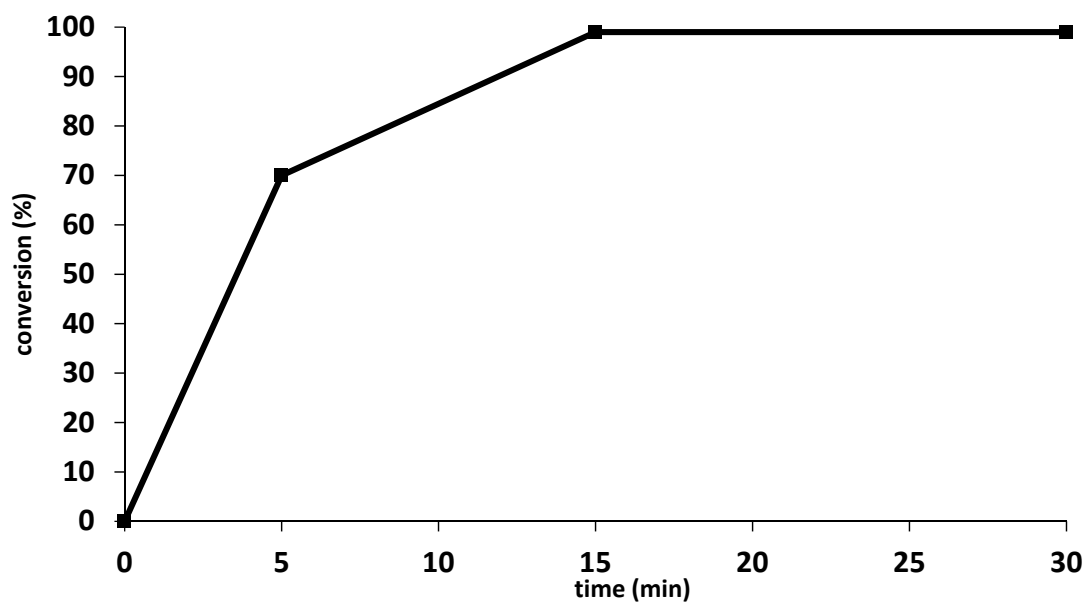

**Figure S8.** ESI-MS spectra of **5**.

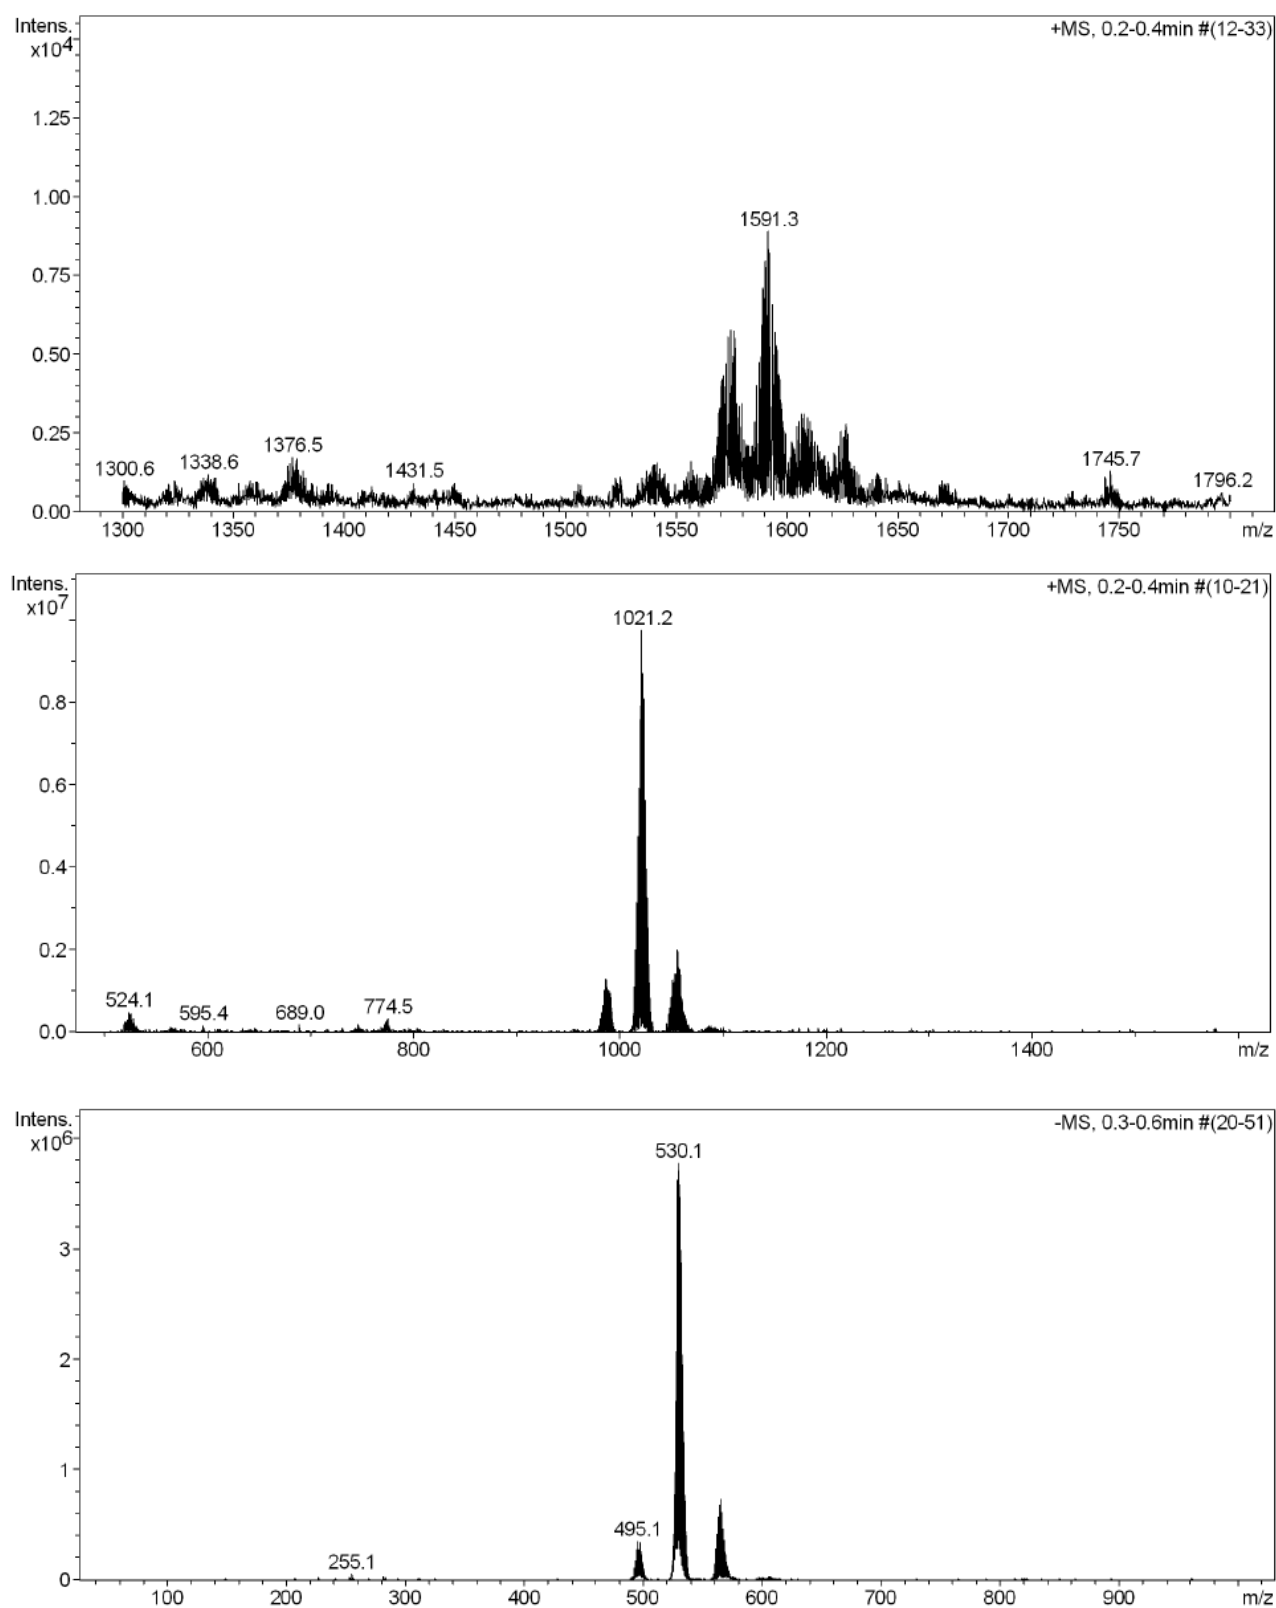

**Table S1.** Photooxidation tests performed with **4** complex.

| Entry | substrate                                                                           | Conv.%               |                                                                                     | Yield.(selec.)%                                       |                                                                                       | Yield(selec.)%        |                                     |
|-------|-------------------------------------------------------------------------------------|----------------------|-------------------------------------------------------------------------------------|-------------------------------------------------------|---------------------------------------------------------------------------------------|-----------------------|-------------------------------------|
| 1     | 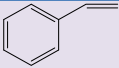   | 70 <sup>[a]</sup> 1  |    | 67(96) <sup>[a]</sup>                                 |     | 1(1) <sup>[a]</sup>   |                                     |
|       |                                                                                     | ≥99 <sup>[b]</sup> 1 |                                                                                     | 57(57) <sup>[b]</sup>                                 |                                                                                       | 35(35) <sup>[b]</sup> |                                     |
| 2     |    | ≥99 <sup>[b]</sup>   |    | 67(67) <sup>[b]</sup>                                 |     | 33(33) <sup>[b]</sup> |                                     |
|       |                                                                                     | ≥99 <sup>[c]</sup>   |                                                                                     | 55(55) <sup>[c]</sup>                                 |                                                                                       | 45(43) <sup>[c]</sup> |                                     |
| 3     |    | 96 <sup>[b]</sup>    |    | 76(79) <sup>[b]</sup>                                 |     | 20(21) <sup>[b]</sup> |                                     |
|       |                                                                                     | ≥99 <sup>[c]</sup>   |                                                                                     | 69(69) <sup>[c]</sup>                                 |                                                                                       | 31(31) <sup>[c]</sup> |                                     |
| 4     |    | 89 <sup>[b]</sup>    |    | 85(96) <sup>[b]</sup>                                 |     | 4(5) <sup>[b]</sup>   |                                     |
|       |                                                                                     | 97 <sup>[c]</sup>    |                                                                                     | 52(54) <sup>[c]</sup>                                 |                                                                                       | 45(46) <sup>[c]</sup> |                                     |
| 5     |  | ≥99 <sup>[b]</sup>   |  | 91[59/32, cis/trans](91 <sup>2</sup> ) <sup>[b]</sup> |  | 9(9) <sup>[b]</sup>   |                                     |
|       |                                                                                     | ≥99 <sup>[c]</sup>   |                                                                                     | 60[36/24, cis/trans](60 <sup>2</sup> ) <sup>[c]</sup> |                                                                                       | 40(40) <sup>[c]</sup> |                                     |
| 7     |  | ≥99 <sup>[b]</sup>   |  | 65(65) <sup>[b]</sup>                                 |   | 15(15) <sup>[b]</sup> | Other products                      |
|       |                                                                                     | ≥99 <sup>[c]</sup>   |                                                                                     | 39(39) <sup>[c]</sup>                                 |                                                                                       | 24(24) <sup>[c]</sup> | 20 <sup>4</sup> (20) <sup>[b]</sup> |
|       |                                                                                     |                      |                                                                                     |                                                       |                                                                                       |                       | 37 <sup>4</sup> (37) <sup>[c]</sup> |

Conditions: **4** (0.01 mM), substrate (20 mM), Na<sub>2</sub>S<sub>2</sub>O<sub>8</sub> (26 mM), 5 mL aqueous solution at pH=7. <sup>[a]</sup> 5 min of reaction <sup>[b]</sup> 15 min of reaction. <sup>[c]</sup> 30 min of reaction. <sup>1</sup> benzaldehyde and benzoic acid produced as another byproducts. <sup>2</sup>selectivity with respect the overall epoxide produced. <sup>3</sup>yield with diol and benzoic acid from vinyl produced. <sup>4</sup>octanal and octanoic produced.

**Table S2.** Photooxidation of epoxides performed with complex **4**.

| Entry    | substrate                                                                          | Conv.%            | Product                                                                             | Yield(select.)%                |
|----------|------------------------------------------------------------------------------------|-------------------|-------------------------------------------------------------------------------------|--------------------------------|
| <b>1</b> |   | $\geq 99^{[a]}$   |   | 90(90) <sup>[a]</sup>          |
|          |                                                                                    | $\geq 99^{[b]}$   |                                                                                     | 60(60) <sup>[b]</sup>          |
| <b>2</b> |   | $\geq 99^{[a]}$   |   | 55(55) <sup>[b]</sup>          |
|          |                                                                                    | $\geq 99^{[b]}$   |                                                                                     | 65(65) <sup>*[c]</sup>         |
| <b>3</b> |  | 97 <sup>[a]</sup> |  | 97( $\geq 99$ ) <sup>[b]</sup> |
|          |                                                                                    | $\geq 99^{[b]}$   |                                                                                     | $\geq 99(\geq 99)^{[c]}$       |

Conditions: **4** (0.01 mM), substrate (20 mM), Na<sub>2</sub>S<sub>2</sub>O<sub>8</sub> (26 mM), 5 mL aqueous solution at pH=7.

<sup>[a]</sup>15 min of reaction <sup>[b]</sup>30 min of reaction. Yield and selectivity with respect the overall diol produced.\* [ [yield (selectivity)] with respect the obtention of benzaldehyde and benzoic acid.

**Table S3.** Photooxidation tests performed with **5** complex.

| Entry | substrate                                                                           | Conv.%                                   |                                                                                     | Yield.(selec.)%                                                      |                                                                                       | Yield(selec.)%                                  |
|-------|-------------------------------------------------------------------------------------|------------------------------------------|-------------------------------------------------------------------------------------|----------------------------------------------------------------------|---------------------------------------------------------------------------------------|-------------------------------------------------|
| 1     | 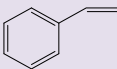   | 75 <sup>[a]</sup> <sup>1</sup>           |    | 23(31) <sup>[a]</sup>                                                |     | 38(51) <sup>[a]</sup>                           |
| 2     |    | 92 <sup>[a]</sup><br>96 <sup>[b]</sup>   |    | 92(>99) <sup>[a]</sup><br>53(55) <sup>[b]</sup>                      |     | 43(45) <sup>[b]</sup>                           |
| 3     |    | 87 <sup>[b]</sup>                        |    | 87(>99) <sup>[b]</sup>                                               |                                                                                       |                                                 |
| 4     |   | >99 <sup>[a]</sup><br>>99 <sup>[b]</sup> |   | 86(86) <sup>[a]</sup><br>83(83) <sup>[b]</sup>                       |    | 14(14) <sup>[a]</sup><br>17(17) <sup>[b]</sup>  |
| 5     |  | 88 <sup>[a]</sup><br>89 <sup>[b]</sup>   |  | 50[50, trans](57) <sup>[a]</sup><br>50[51, trans](57) <sup>[b]</sup> |  | 38(43) <sup>[a]</sup><br>37 (42) <sup>[b]</sup> |

Conditions: **5** (0.001 mM), substrate (20 mM), Na<sub>2</sub>S<sub>2</sub>O<sub>8</sub> (26 mM), 5 mL aqueous solution at pH=7. <sup>[a]</sup> 15 min of reaction. <sup>[b]</sup> 30 min of reaction. <sup>1</sup> benzaldehyde and benzoic acid produced as another byproducts.
